# Supplementary material for: Genomics-guided identification of a conserved CptBA-like toxin-antitoxin system in Acinetobacter baumannii
Source: PubMed Central journal article supplement — J Adv Res. 2020 Nov 23;30:159–70. doi: 10.1016/j.jare.2020.11.007 (PMC8132199; doi:10.1016/j.jare.2020.11.007), 2020-11-23
Supplement: mmc1.pdf [file mmc1.pdf]

105

---

**Supplementary Tables**

---

106

107 **Table S1: List of strains used in this study**

| <b>Bacterial strains</b>         | <b>Characterization</b>                           | <b>Source/ Reference</b>                      |
|----------------------------------|---------------------------------------------------|-----------------------------------------------|
| <i>Acinetobacter baumannii</i>   | ATCC 17978                                        | (Baumann <i>et al.</i> , 1968)                |
| <i>Escherichia coli</i> strains: |                                                   |                                               |
| TOP10                            | Cloning host for maintaining recombinant plasmids | Department of Microbiology culture collection |
| NEB 5-alpha                      | Cloning host for maintaining recombinant plasmids | New England Biolab, US                        |
| XL-1 Blue                        | Cloning host for maintaining recombinant plasmids | Agilent, US                                   |
| BL21(DE3)                        | Expression host                                   | Novagen, USA                                  |

108

109 Table S2: List of primers used in this study

| Name       | Sequence (5' -3')                                        | Function                                                                                                                                                                                                                                                                                                                                                                       |
|------------|----------------------------------------------------------|--------------------------------------------------------------------------------------------------------------------------------------------------------------------------------------------------------------------------------------------------------------------------------------------------------------------------------------------------------------------------------|
| RT_aptA-F  | ATGCCGTTACTATGGTGGTTAG                                   | Transcriptional analysis in <i>A. baumannii</i>                                                                                                                                                                                                                                                                                                                                |
| RT_aptA-R  | CGAGAAATGGTGTCTGTGAATG                                   | Transcriptional analysis in <i>A. baumannii</i>                                                                                                                                                                                                                                                                                                                                |
| RT_aptB-F  | GGTCTTCTGTTCTACCAACTC                                    | Transcriptional analysis in <i>A. baumannii</i>                                                                                                                                                                                                                                                                                                                                |
| RT_aptB-R  | CGTCGTGGTTTAAAGGAAATTGA                                  | Transcriptional analysis in <i>A. baumannii</i>                                                                                                                                                                                                                                                                                                                                |
| RT_aptBA-F | CTGAGTTGGTAGAACAGGAAGAC                                  | Transcriptional analysis in <i>A. baumannii</i>                                                                                                                                                                                                                                                                                                                                |
| RT_aptBA-R | AGCTGATTACAACCTAACCACCATA                                | Transcriptional analysis in <i>A. baumannii</i>                                                                                                                                                                                                                                                                                                                                |
| 16S-rRNA-F | TGAGATGTTGGGTTAAGTCCCGCA                                 | Housekeeping gene for transcriptional analysis in <i>A. baumannii</i>                                                                                                                                                                                                                                                                                                          |
| 16S-rRNA-R | TGTAGCAACCCTTTGTACCGACCA                                 |                                                                                                                                                                                                                                                                                                                                                                                |
| ihfB-F     | GATAGAAAGACTTGCCACCCA                                    | Integration host beta subunit used as housekeeping gene for transcriptional analysis in <i>E. coli</i> .                                                                                                                                                                                                                                                                       |
| ihfB-R     | CCAGTTCTACTTTATCGCCAG                                    |                                                                                                                                                                                                                                                                                                                                                                                |
| cptB-F     | GATACCATGGTCATGTGATCAGGTAAC T ( <i>Nco</i> I)            | Amplification of <i>cptB</i> fragment together with 50bp at 5' end of <i>cptB</i> for cloning in pET28b (+).                                                                                                                                                                                                                                                                   |
| cptB-R     | TCAAGAATTCTTAACCATGAACATAGTGT T ( <i>Eco</i> RI)         |                                                                                                                                                                                                                                                                                                                                                                                |
| RBS-F      | GATAGAGCTCTCATGTGATCAGGTAAC T ( <i>Sac</i> I)            | For amplification of the 50bp (ribosome binding site) upstream to the <i>cptBA</i> system used in the overlap extension PCR with <i>cptA</i> ORF. The underlined segment represents the first 15 nucleotides of <i>cptA</i> ORF, while the shaded segment is the last 20 nucleotides in the ribosome binding site.                                                             |
| RBS-R      | CAAATGGTTGATCAATTATTTCCCATCT GCGTTG                      |                                                                                                                                                                                                                                                                                                                                                                                |
| cptA-F     | GCAGATGGGGAAATAATTGATCAACCAT TTGAATT                     | For amplification of <i>cptA</i> used in the overlap extension PCR with the ribosome binding site. The shaded segment is the last 16 nucleotides in the ribosome binding site while the underlined segment represents the first 22 nucleotides of <i>cptA</i> ORF. RBS-F and <i>cptA</i> -R primers were used for overlap extension PCR of <i>cptA</i> with RBS region (50bp). |
| cptA-R     | TGTCGAATTCCTTAATAGAGTTTTTCTAAAG ( <i>Eco</i> RI)         |                                                                                                                                                                                                                                                                                                                                                                                |
| T7-F       | TAATACGACTCACTATAGGG                                     | For checking cloning in pET28b (+).                                                                                                                                                                                                                                                                                                                                            |
| T7-R       | GCTAGTTATTGCTCAGCGG                                      |                                                                                                                                                                                                                                                                                                                                                                                |
| GTApBAD-F  | TTCGAGCTCGGTACCCGGGGATCCTGGT ACCTCATGTGATCAGGTAACCTAAGCG | For amplification of <i>cptA-cptB-P<sub>T7</sub></i> promoter and <i>lacI</i> gene, and cloning in pBAD18 ori using Gibson assembly cloning kit.                                                                                                                                                                                                                               |
| GTApBAD-R  | AAGCTTGCATGCCTGCAGGTCGACTACTG CCCGCTTTCCAGTC             |                                                                                                                                                                                                                                                                                                                                                                                |
| pBAD-F     | ATGCCATAGCATTTTTATCC                                     | For checking cloning in pBAD18 ori.                                                                                                                                                                                                                                                                                                                                            |
| pBAD-R     | GATTTAATCTGTATCAGGF                                      |                                                                                                                                                                                                                                                                                                                                                                                |
| lacI-R     | ACTGCCCGCTTTCCAGTC                                       | Used with pBAD-F to confirm the orientation of <i>cptA-cptB-P<sub>T7</sub>-lacI</i> template within the pBAD18 ori.                                                                                                                                                                                                                                                            |

---

|                 |                                                     |                                                                                                                                    |
|-----------------|-----------------------------------------------------|------------------------------------------------------------------------------------------------------------------------------------|
| <i>cptBA</i> -F | GAACGAATTCATTGTTCTGGCATGGTGG<br>( <i>EcoRI</i> )    | For amplification of <i>A. baumannii</i> <i>cptBA</i> TA system together with its upstream promoter (401bp) for cloning in pBAD42. |
| <i>cptBA</i> -R | TGTCGAATTCCTTAATAGAGTTTTTCTAAAG<br>( <i>EcoRI</i> ) |                                                                                                                                    |

---

110

111

## Supplementary Figures

112

113 **Figure S1:**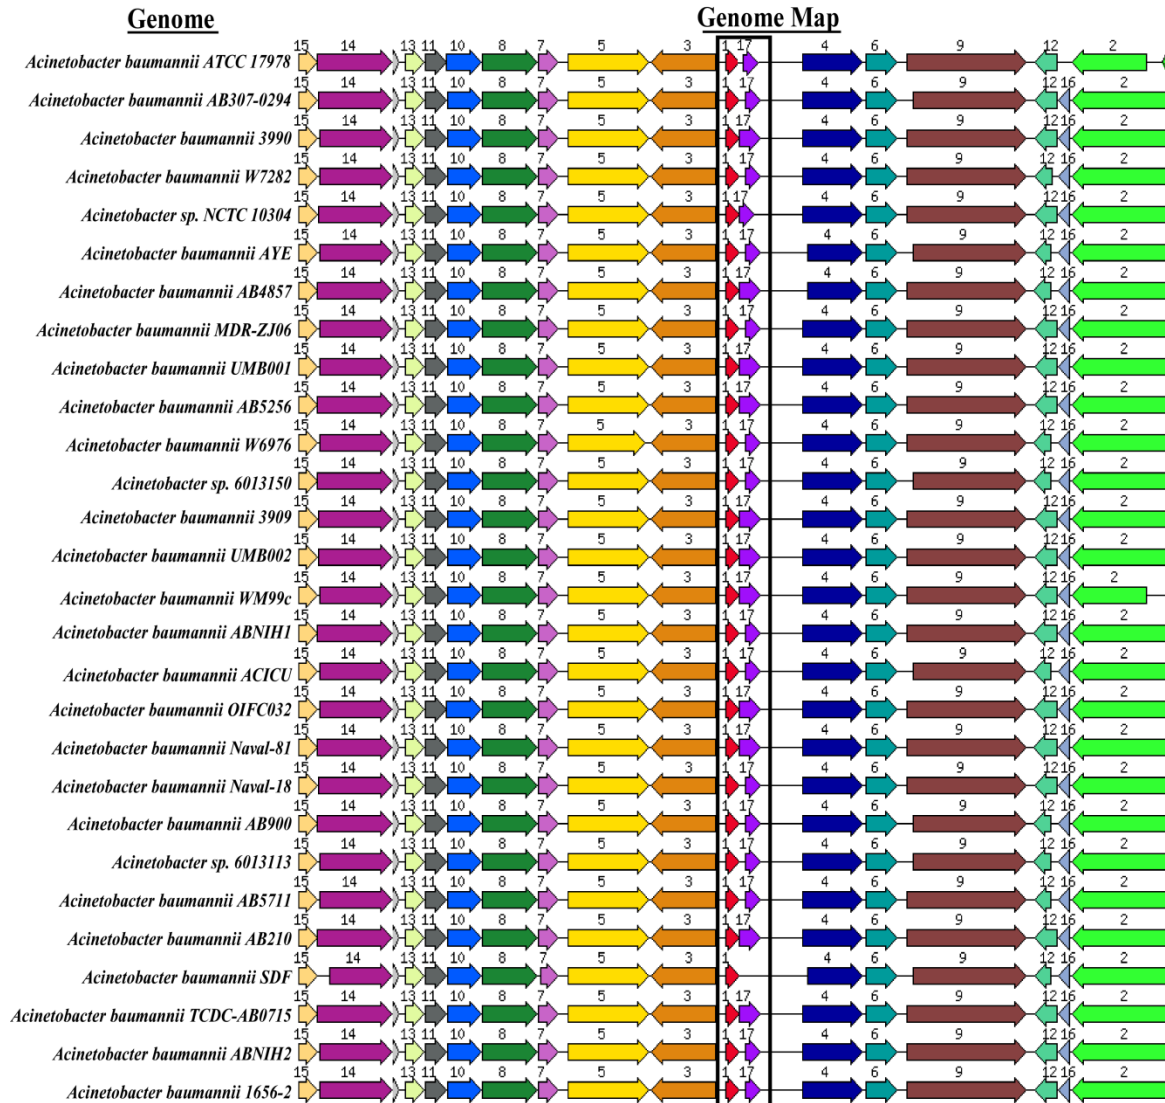114 **Figure S1: Abundance and gene orientation of *cptBA* alleles among different *Acinetobacter* spp.**

115 Genetic maps of different *Acinetobacter* spp. showing the conservation of the corresponding *cptA* and  
 116 *cptB* genes alleles in 195 strains of *A. baumannii* in the same synthetic order. The red arrow (labeled  
 117 "1") and the purple arrow (labeled "17") represent the antitoxin and the toxin genes, respectively. The  
 118 result was retrieved from the SEED Viewer Compare Region tool and NCBI database.

119 **Figure S2:**

120

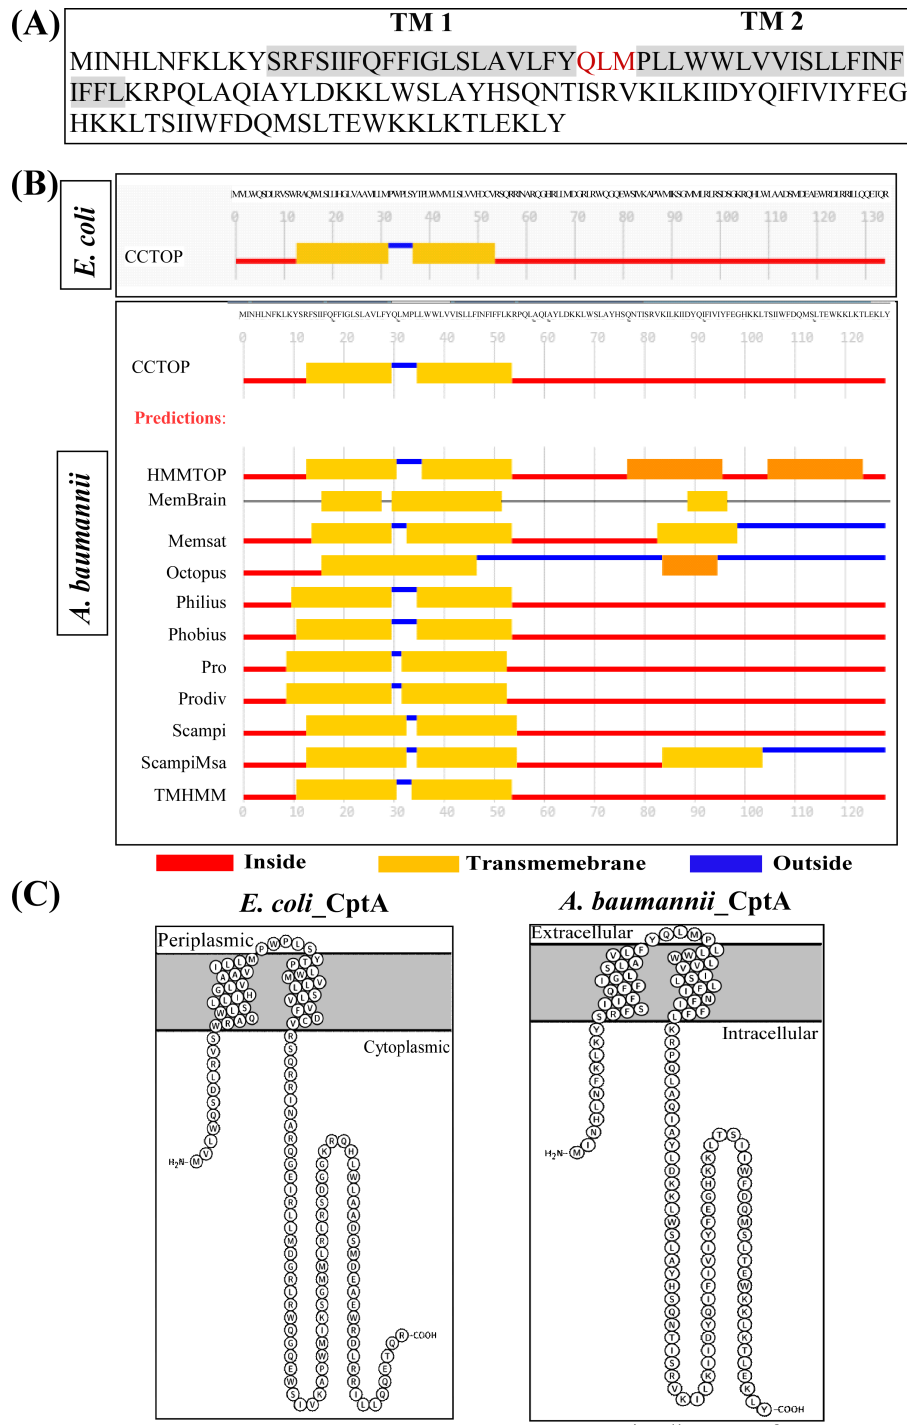

121

122

123

124 **Figure S2: Predicted topology of the hypothetical *A. baumannii* toxin simulating the**  
 125 **transmembrane nature of *E. coli* CptA.**

126 (A) Amino acid sequence of *A. baumannii* CptA-like toxin showing two transmembrane domains

127 (TM1 and TM2). (B) Output from the CCTOP server showing all possible topologies of the

128 *A. baumannii* toxin candidates versus *E. coli* CptA, (C) A Protter-generated schematic diagram of

129 CptA toxin in both *E. coli* and *A. baumannii* showing similar distribution of amino acids through the  
130 bacterial membrane.

131 **Figure S3:**

132

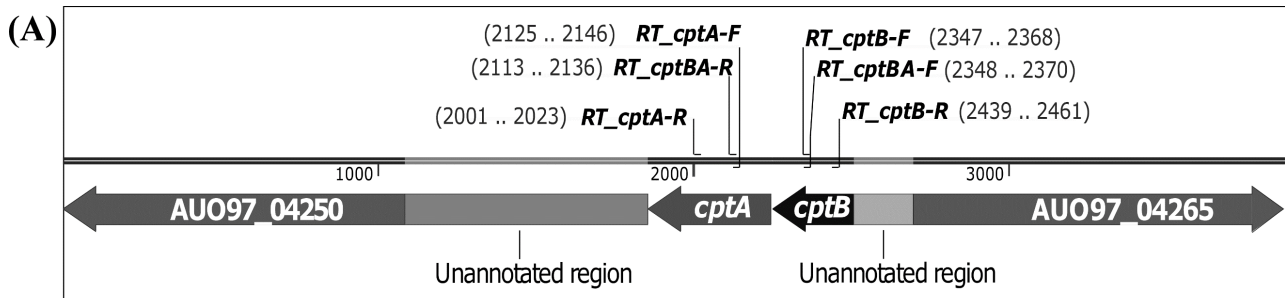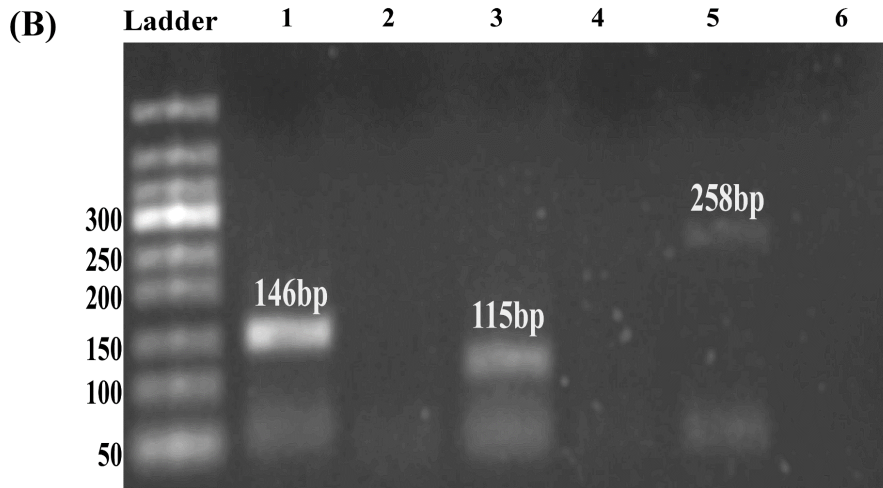

133

134 **Figure S3: Transcriptional analysis of *cptBA* in *A. baumannii* ATCC 17978.**

135 (A) Genetic map showing about 3.86 Kb of *A. baumannii* chromosomal DNA including *cptB* (the  
 136 antitoxin) and *cptA* (the toxin) encoding genes together with primer-binding sites used in RT-PCR  
 137 experiment. This map was generated by Snapgene® viewer software. (B) A photograph of a 2 %  
 138 wt/vol agarose gel showing the positive RT-PCR products of the *cptB* antitoxin (115 bp), the *cptA*  
 139 toxin (146 bp) and part of the polycistronic *cptBA* cDNA (258 bp) at lanes 1, 3, and 5, respectively. A  
 140 non-RT RNA sample was used as a negative control to rule out any DNA traces (lanes 2, 4, and 6).  
 141 The first lane contained 50 bp DNA ladder (Qiagen, Germany) for size comparison.

142

143 **Figure S4:**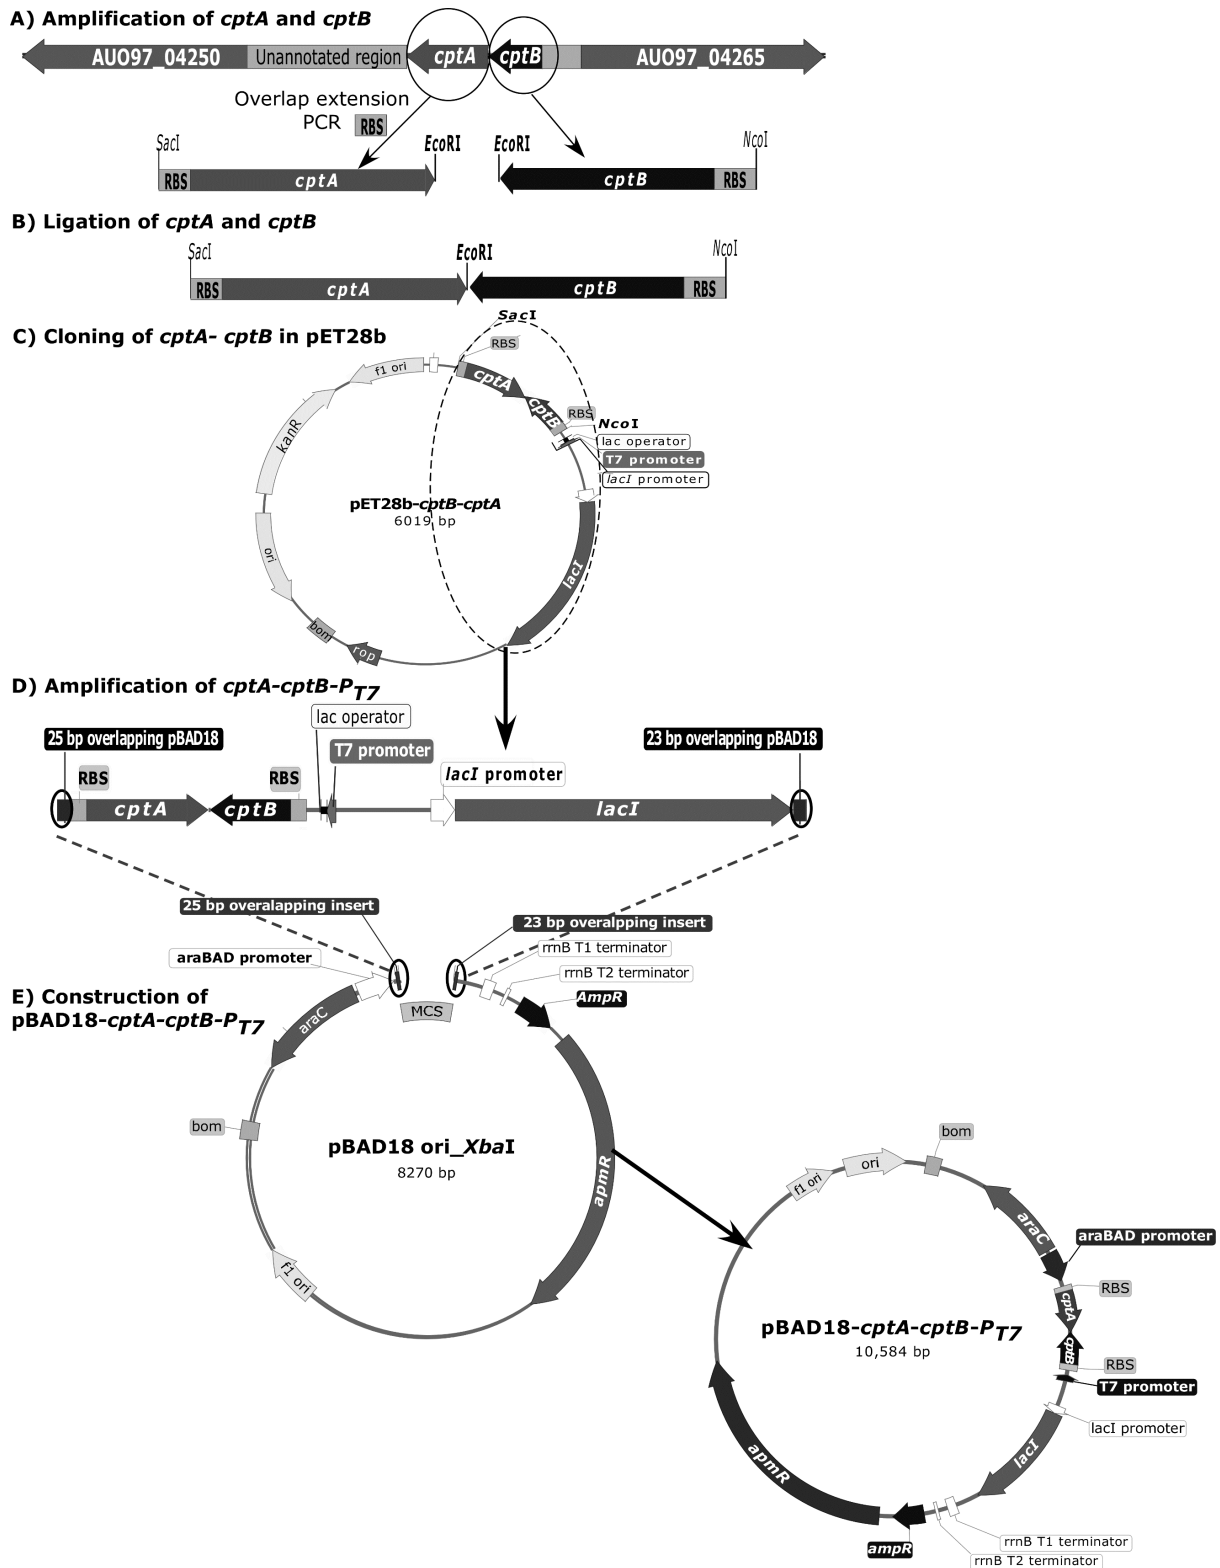

144

145 **Figure S4: Schematic diagram for the construction of dual promoter pBAD18-*cptA-cptB-P<sub>T7</sub>***  
 146 **vector.**

147 The diagram showed the steps carried out for the construction of dual promoter vector of pBAD18-  
 148 *cptA-cptB-P<sub>T7</sub>* in which the *cptB* antitoxin was under the control of *P<sub>T7</sub>* promoter while the *cptA* toxin  
 149 was controlled by araBAD *P<sub>BAD</sub>* promoter.



150 **Figure S5:**

151

**(A) Amplification of *cptB* (antitoxin, AUO97\_04260) with upstream RBS**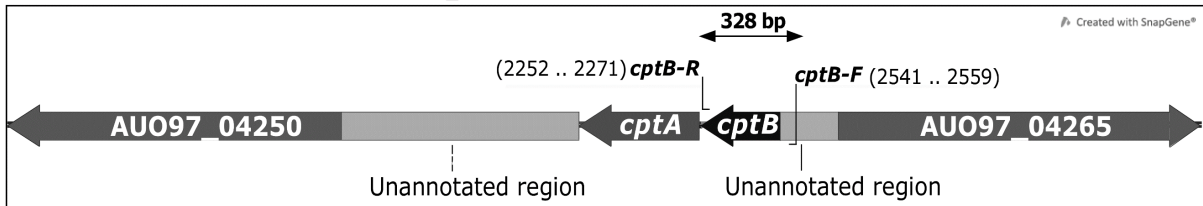**(B) Amplification of *cptA* (toxin, AUO97\_04255) and RBS fragment**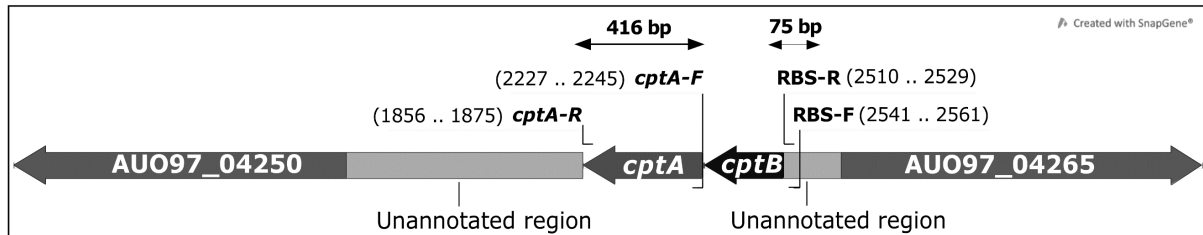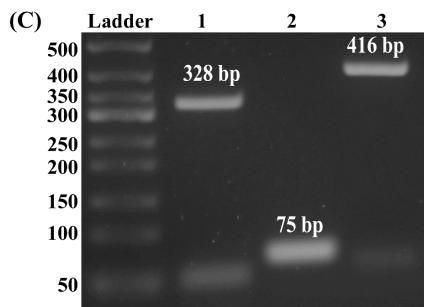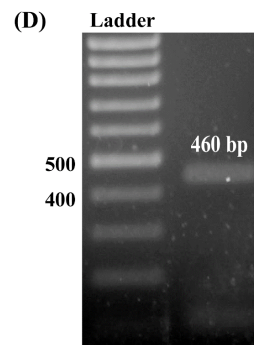

152

153

**Figure S5: The *cptBA* cassette locus within *A. baumannii* ATCC 17978 genome.**

154 (A) Genetic map of the antitoxin and the upstream region, containing the ribosome-binding site,  
 155 showing the binding sites of *cptB*-F/R primers and the expected size of the amplicon obtained using  
 156 them. (B) Genetic map of the toxin and the upstream region, containing the ribosome-binding site,  
 157 showing the binding sites of *cptA*-F/R primers in addition to RBS-F/R and the expected sizes of the  
 158 amplicons obtained using them. Maps were generated with SnapGene® viewer software. (C) A  
 159 photograph of a 2 % wt/vol agarose gel showing the PCR products that were obtained using the  
 160 following primers: *cptB*-F/R primer pair with overhanging *Nco*I and *Eco*RI restriction sites (lane 1,  
 161 328 bp), RBS-F/R primer pair (lane 2, 75 bp), and RBS-F/ *cptA*-R primer pair with overhanging *Sac*I  
 162 and *Eco*RI restriction sites (lane 4, 416 bp). The first lane contained 50 bp DNA ladder (Qiagen,  
 163 Germany). (D) A photograph of a 2 % wt/vol agarose gel showing the overlap extension PCR  
 164 products (460 bp) of toxin and RBS obtained using the RBS-F/*cptA*-R primer pair. The first lane  
 165 contained a 100-bp DNA ladder (Thermo Scientific™ GeneRuler™ 100 bp Plus) for size comparison.

166

**Figure S6:**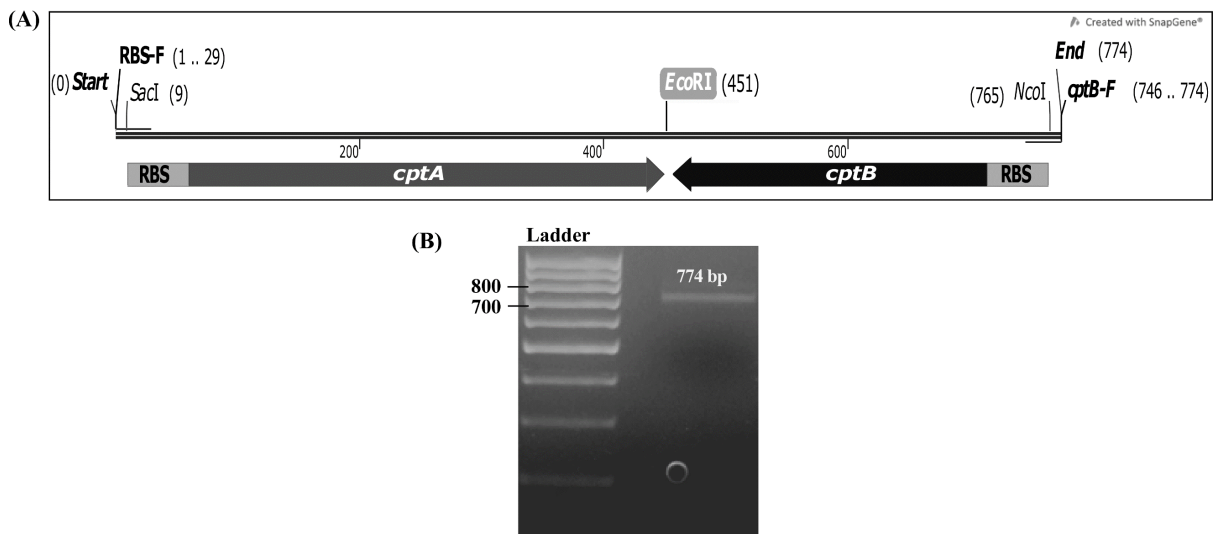

167

168

169 **Figure S6: Ligation of the amplified RBS-Toxin and the RBS-Antitoxin products by their 3'**  
 170 **ends.**

171 (A) Genetic map of the ligated *A. baumannii* *cptA-cptB* TA system in reverse orientation by their  
 172 3'ends through the overhang *EcoRI* sites. The map was generated by SnapGene® viewer software.

173 (B) A photograph of a 1% wt/vol agarose gel showing PCR product of the ligated *cptA-cptB* (774 bp)  
 174 using *cptB-F/RBS-F* primer pair with overhanging *NcoI* and *SacI* restriction sites. The first lane  
 175 contained a DNA ladder (Thermo Scientific™ GeneRuler 100 bp Plus) for size comparison.

176

177

178 **Figure S7:**

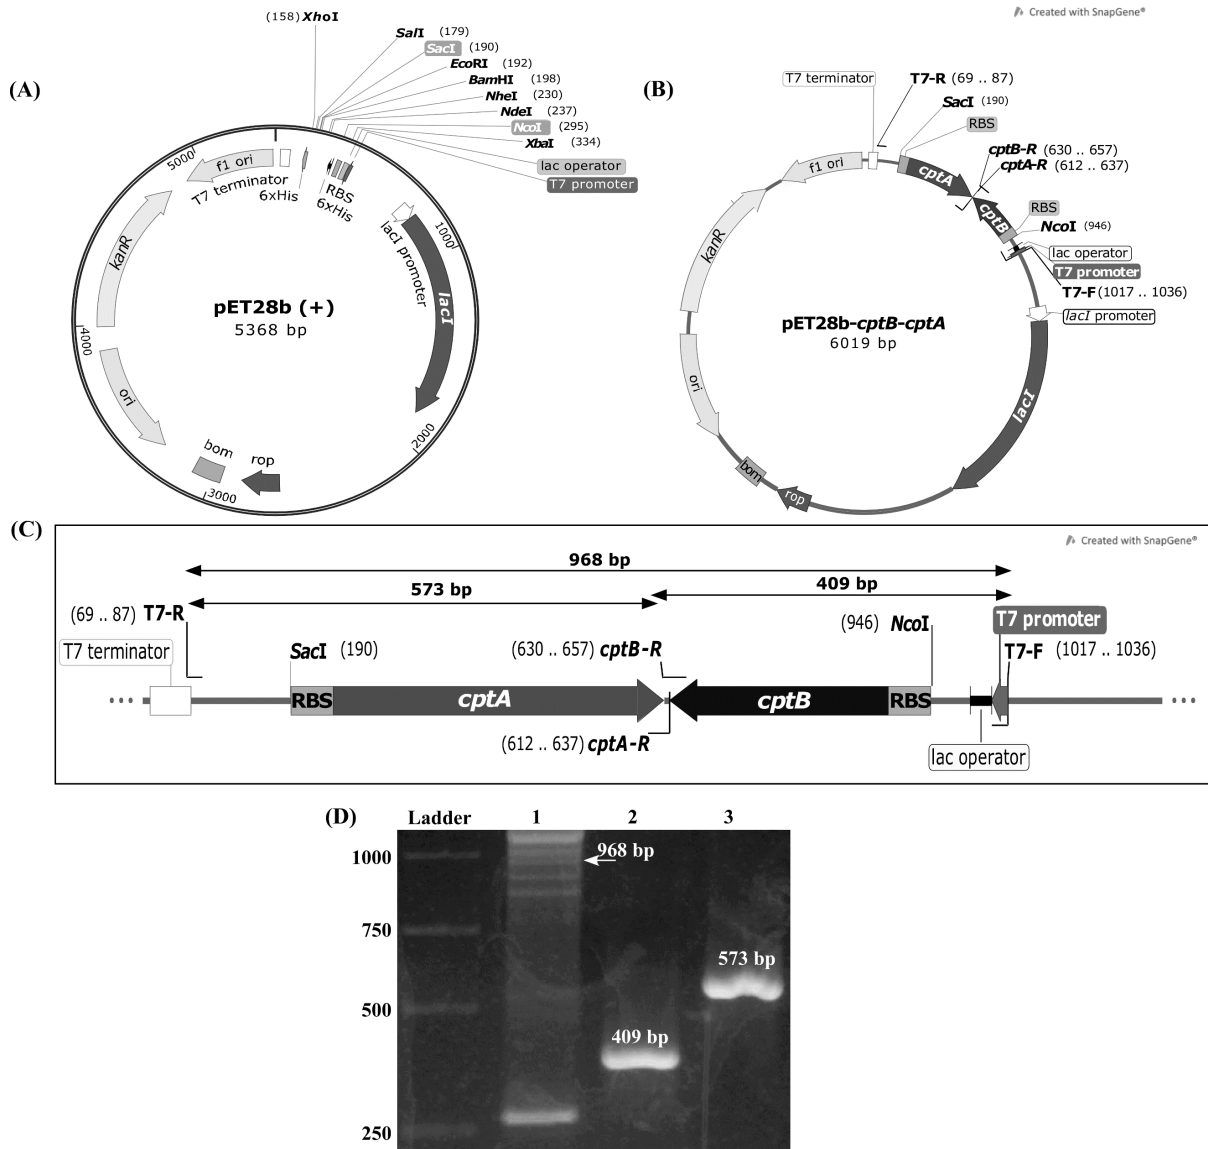

179

180 **Figure S7: Cloning of *cptB-cptA* in pET28b (+).**

181 (A) Genetic map of the pET28b (+) plasmid, showing the multiple cloning site (MCS). (B) Genetic  
 182 map of the pET28b plasmid with *cptB-cptA*, inserted through *SacI* and *NcoI* ends so that antitoxin will  
 183 be under the control of T7 promoter (*P<sub>T7</sub>*). (C) Genetic map of the MCS with *cptA-cptB* in the cloned  
 184 pET28b. The map shows binding sites of primers used for detection of insertion and correct  
 185 orientation—with the expected product sizes. This map was generated by SnapGene® viewer  
 186 software. (D) A photograph of a 1 % wt/vol agarose gel showing the PCR products of 968 bp, 409 bp  
 187 and 573 bp obtained using the T7-F/R primer pair (lane 2), T7-F/*cptB*-R primer pair (lane 3) and T7-  
 188 R/ *cptA*-R primer pair (lane 4), respectively. The first lane contained 1 Kb DNA ladder (Solis  
 189 Biodyne, Estonia) for size comparison.

190 **Figure S8:**

191 (A)

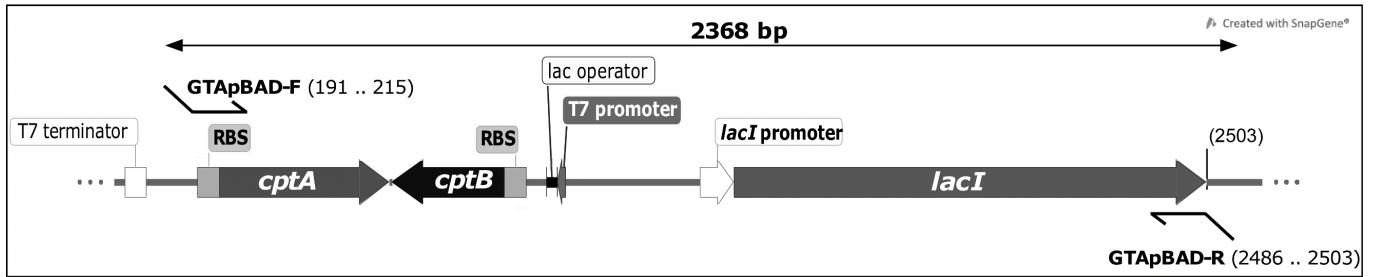

(B)

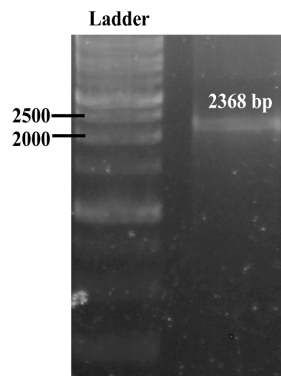

192 **Figure S8: Amplification of *cptA-cptB*- $P_{T7}$  promoter and *lacI* gene using the cloned pET28b-**  
 193 ***cptA-cptB* as template.**

194 (A) Genetic map of a part of the cloned pET28b-*cptB-cptA* showing the *cptA-cptB*- $P_{T7}$  and *lacI* gene,  
 195 and the binding sites for the GTApBAD-F/R primers, used in the amplification of the *cptA-cptB*- $P_{T7}$   
 196 and *lacI* gene, for cloning of pBAD18 ori. This map was generated by SnapGene® viewer software.

197 (B) A photograph of a 0.8 % wt/vol agarose gel showing the PCR product (2368 bp) of the *cptA-cptB*-  
 198  $P_{T7}$  promoter with the *lacI* gene obtained using the GTApBAD-F/R primer pair. The first lane  
 199 contained 1 Kb DNA ladder (Solis Biodyne, Estonia) for size comparison.

200 **Figure S9:**

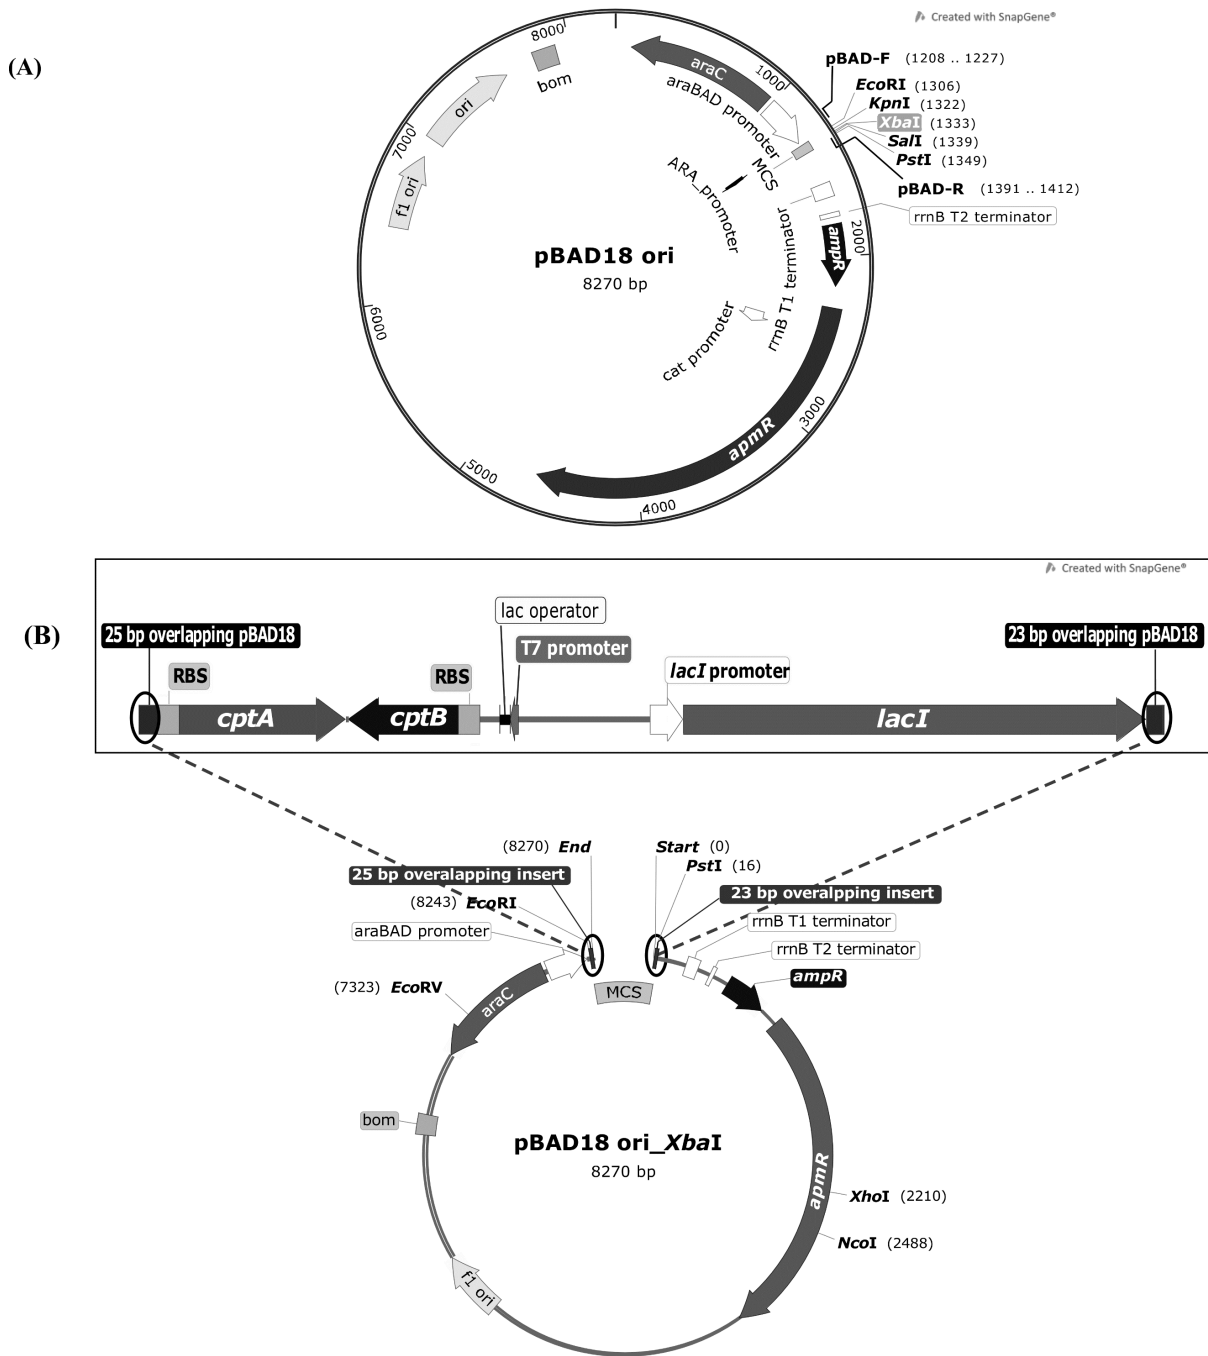

201

202

203 **Figure S9: Diagrammatic illustration of insertion of *cptA-cptB-P<sub>T7</sub>-lacI* fragment in pBAD18 ori**  
 204 **using Gibson assembly cloning technique.**

205 (A) A Genetic map for the pBAD18 ori showing the MCS. (B) A schematic map for the amplified  
 206 *cptA-cptB- P<sub>T7</sub>* promoter-*lacI* gene using GTApBAD-F/R primer pairs with 23-25 bp overlapping  
 207 regions with the *XbaI* digested pBAD18 ori. The maps were generated by SnapGene® viewer  
 208 software.

209

210 **Figure S10:**

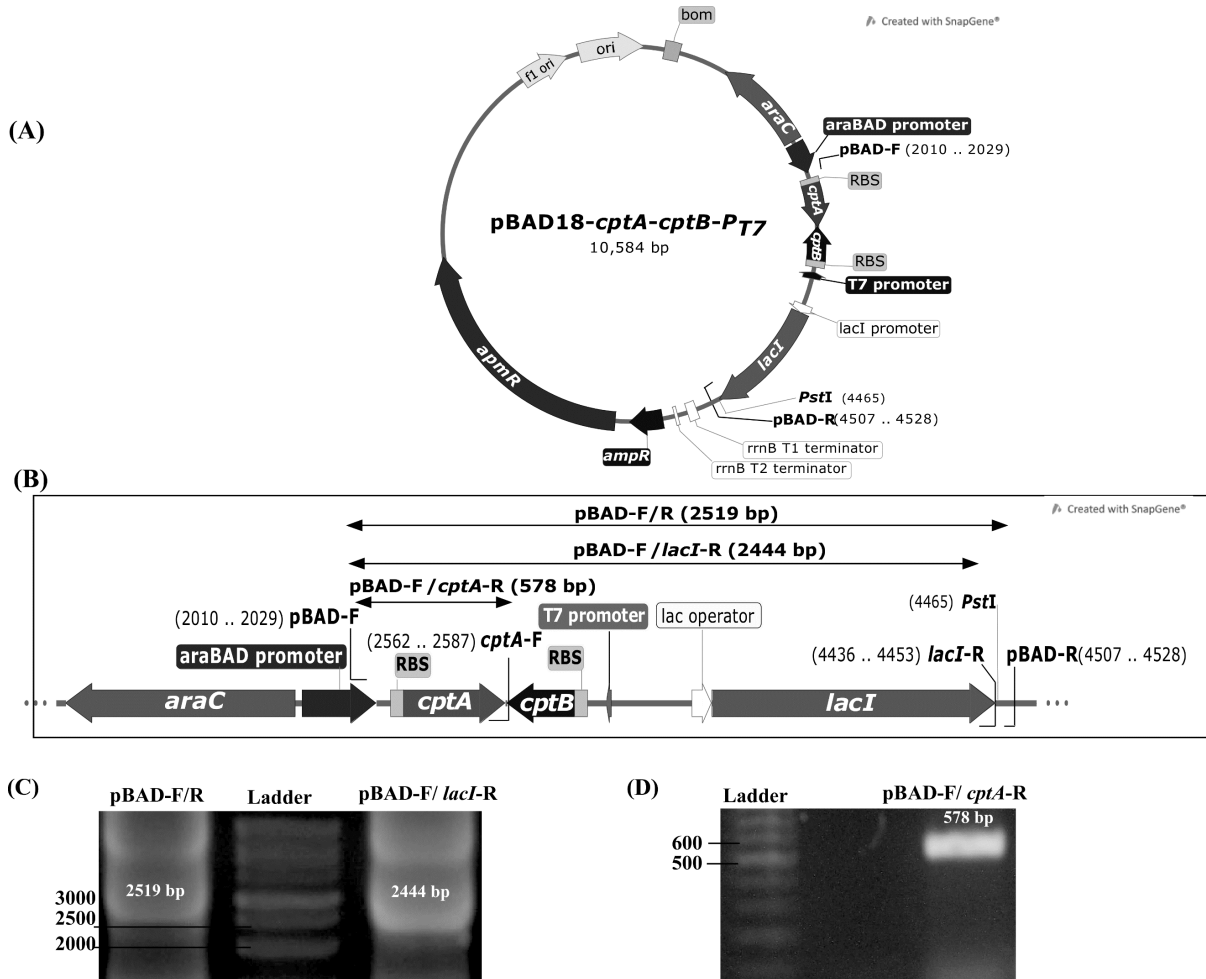

211

212

213 **Figure S10: Construction and confirmation of the dual promoter vector, pBAD18-*cptA-cptB-***  
 214 ***P<sub>T7</sub>*.**

215 (A) Genetic map for dual promoter vector pBAD18-*cptA-cptB-P<sub>T7</sub>*. (B) A detailed schematic map for  
 216 *cptA-cptB-P<sub>T7</sub>* region within pBAD18 *ori* showing the presence of *cptA* under the control of *araBAD*  
 217 promoter. The diagram shows the binding sites of primers used for detection of insertion and correct  
 218 orientation together with the expected product sizes. These maps were generated by SnapGene®  
 219 viewer software. (C) A photograph of a 0.8 % wt/vol agarose gel showing the PCR products of 2519  
 220 bp and 2444 bp obtained using the pBAD-F/R primer pair (lane 1) and pBAD-F/*lacI*-R primer pair  
 221 (lane 3), respectively. The first lane contained 1 Kb DNA ladder (Solis Biodyne, Estonia). (D) A  
 222 photograph of a 1.5 % wt/vol agarose gel showing the PCR products of 578 bp obtained using the  
 223 pBAD-F/*cptA*-R primer pair (lane 3). The first lane contained DNA ladder (Thermo Scientific™  
 224 GeneRuler 100 bp Plus).

225

226

227 **Figure S11:**

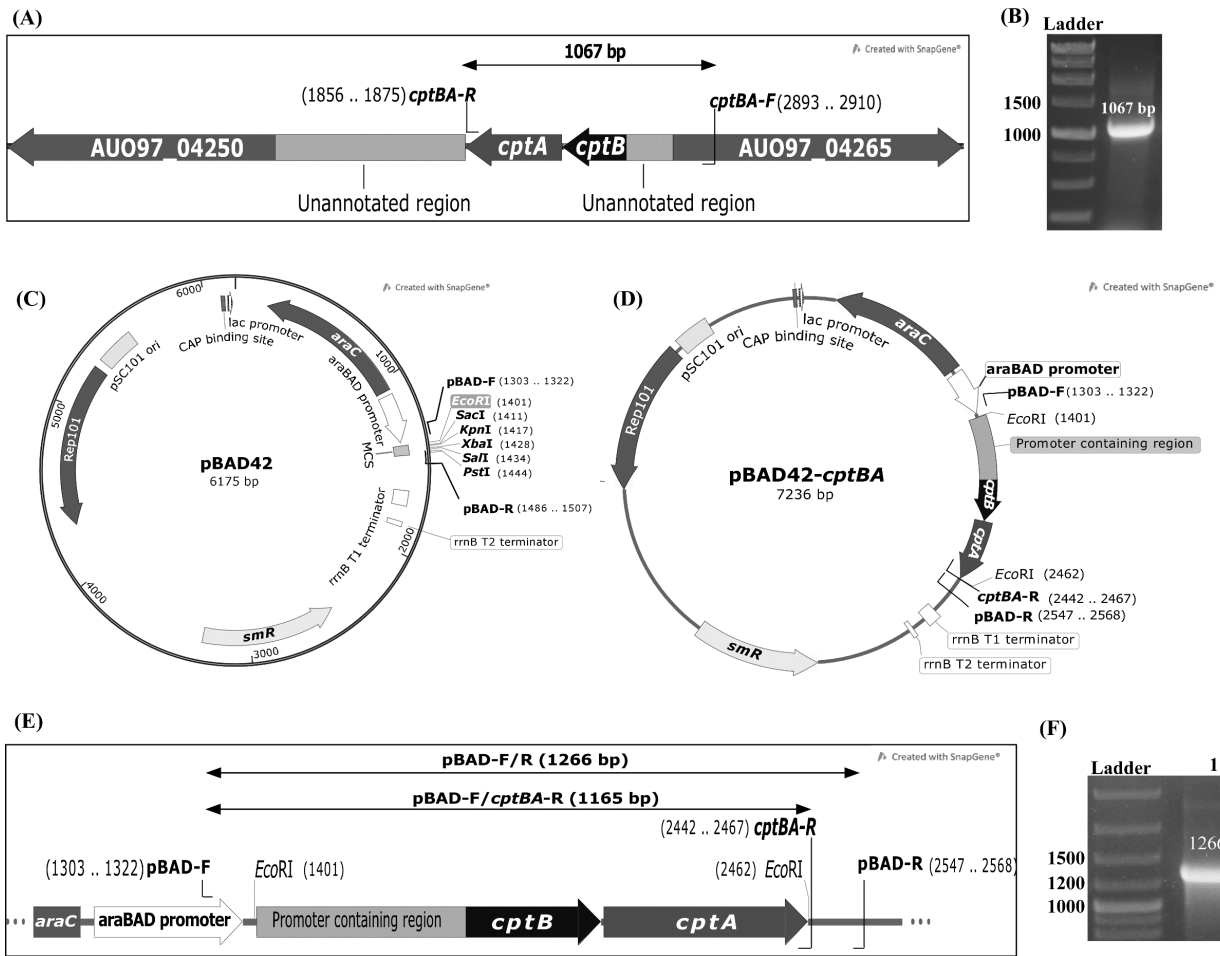

228

229 **Figure S11: Construction and confirmation of pBAD42-cptBA.**

230

231 (A) Genetic map showing about 3.86 Kb subunits of *A. baumannii* chromosomal DNA including  
 232 *cptBA* locus together with binding sites of *cptBA*-F/R primers (with overhang *Eco*RI site) used in the  
 233 amplification of *cptBA* with 401 bp upstream region, that is expected to contain the promoter. (B) A  
 234 photograph of a 0.8 % wt/vol agarose gel showing the product of the *cptBA* locus with upstream  
 235 promoter containing region (1067 bp). The first lane contained 1 Kb DNA ladder (Solis Biodyne,  
 236 Estonia). (C) Genetic map of the pBAD42 showing the MCS. (D) Genetic map of the cloned  
 237 pBAD42-*cptBA* so that the antitoxin precedes the toxin and the whole system is under the control of  
 238 *araBAD* promoter. (E) Detailed genetic map for the MCS with *cptBA* cloned in pBAD42. It shows  
 239 binding sites of primers used for detection of insertion and correct orientation with the expected  
 240 product sizes. (F) A photograph of a 1 % wt/vol agarose gel showing the PCR products of 1266 bp  
 241 and 1165 bp obtained using the pBAD-F/R primer pair (lane 1) and pBAD-F/*cptBA*-R primer pair  
 242 (lane 2), respectively. The first lane contained DNA ladder (Thermo Scientific™ GeneRuler 100 bp  
 243 Plus). All maps were generated by SnapGene® viewer software.

244

245

246 **Figure S12:**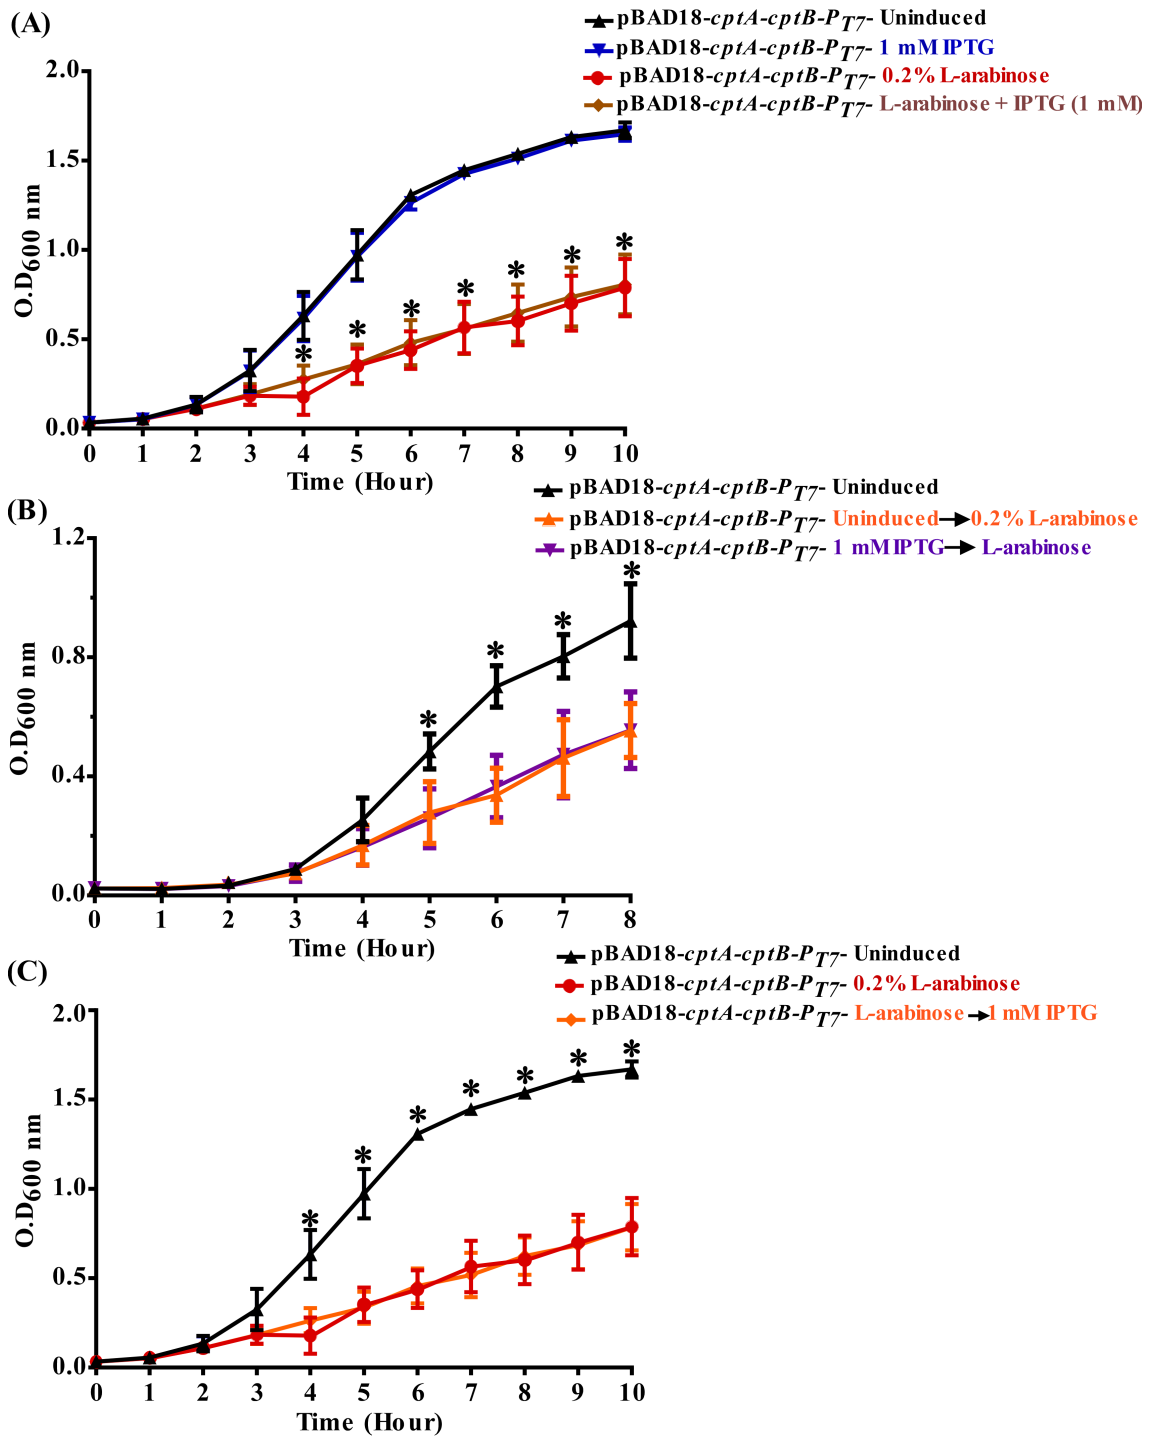

247

248 **Figure S12: Overproduction of *A. baumannii* CptA toxin vs. the CptB antitoxin in *E. coli*.**

249 Growth curves of *E. coli* B121(DE3) cells harboring the dual promoter plasmid pBAD18-*cptA-cptB*-*P<sub>T7</sub>*  
 250 vs. uninduced cells (control) at the following conditions: (A) induction by either 0.2% L-arabinose  
 251 (CptA inducer), 1 mM IPTG (CptB inducer), or both; (B) induction of antitoxin expression prior to  
 252 toxin expression; (C) induction of toxin expression prior to that of the antitoxin. OD<sub>600nm</sub> was measured  
 253 every hour up to 10 hours. The data represent the means of three independent experiments. Error bars  
 254 represent the standard error of the means. Asterisks (\*) indicate statistically significant differences



255 ( $p < 0.05$ ) between induced and uninduced cells. All comparisons were evaluated by ANOVA followed  
256 by *post hoc t*-tests with Holm-Sidak correction for multiple testing.

257

258 **Figure S13:**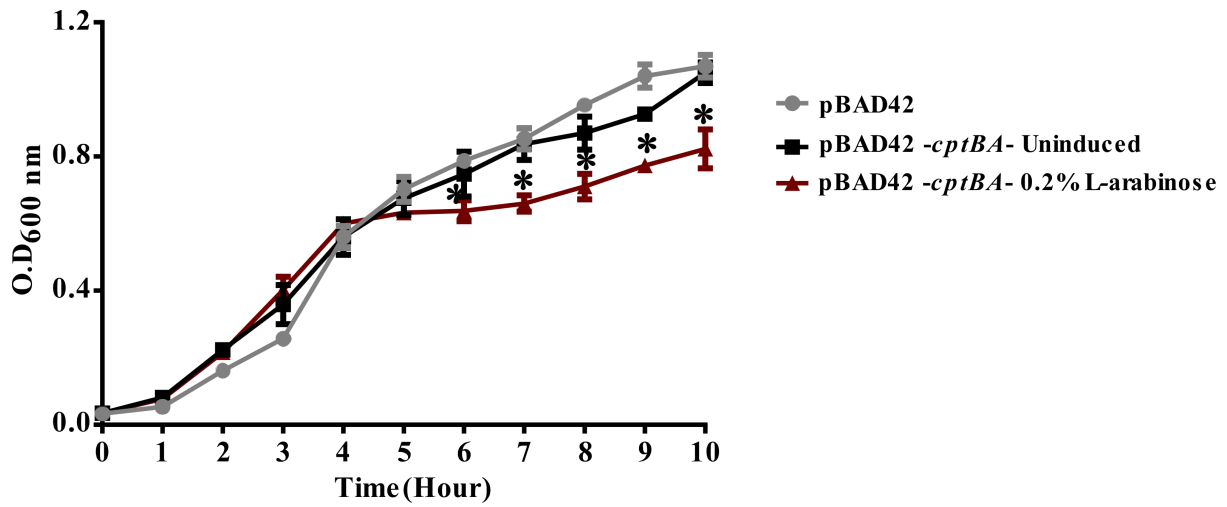

259

260 **Figure S13: Effect of overproduction of *A. baumannii* CptBA TA pair on the growth of *E. coli*.**

261 Growth curve of *E. coli* B121(DE3) cells harboring the single promoter plasmid pBAD42-*cptBA*  
 262 induced by 0.2% L-arabinose (inducing *cptBA*) vs. uninduced cells, and those carrying pBAD42  
 263 (control vector). Samples were drawn every hour for 10 hours. The data represent the means of three  
 264 independent experiments. The error bars represent the standard error of the means. Asterisks (\*)  
 265 indicate statistically significant differences against uninduced cells (at  $p < 0.05$ ), as determined by  
 266 ANOVA followed by *post hoc t* test.

267

268

269 **Figure S14:**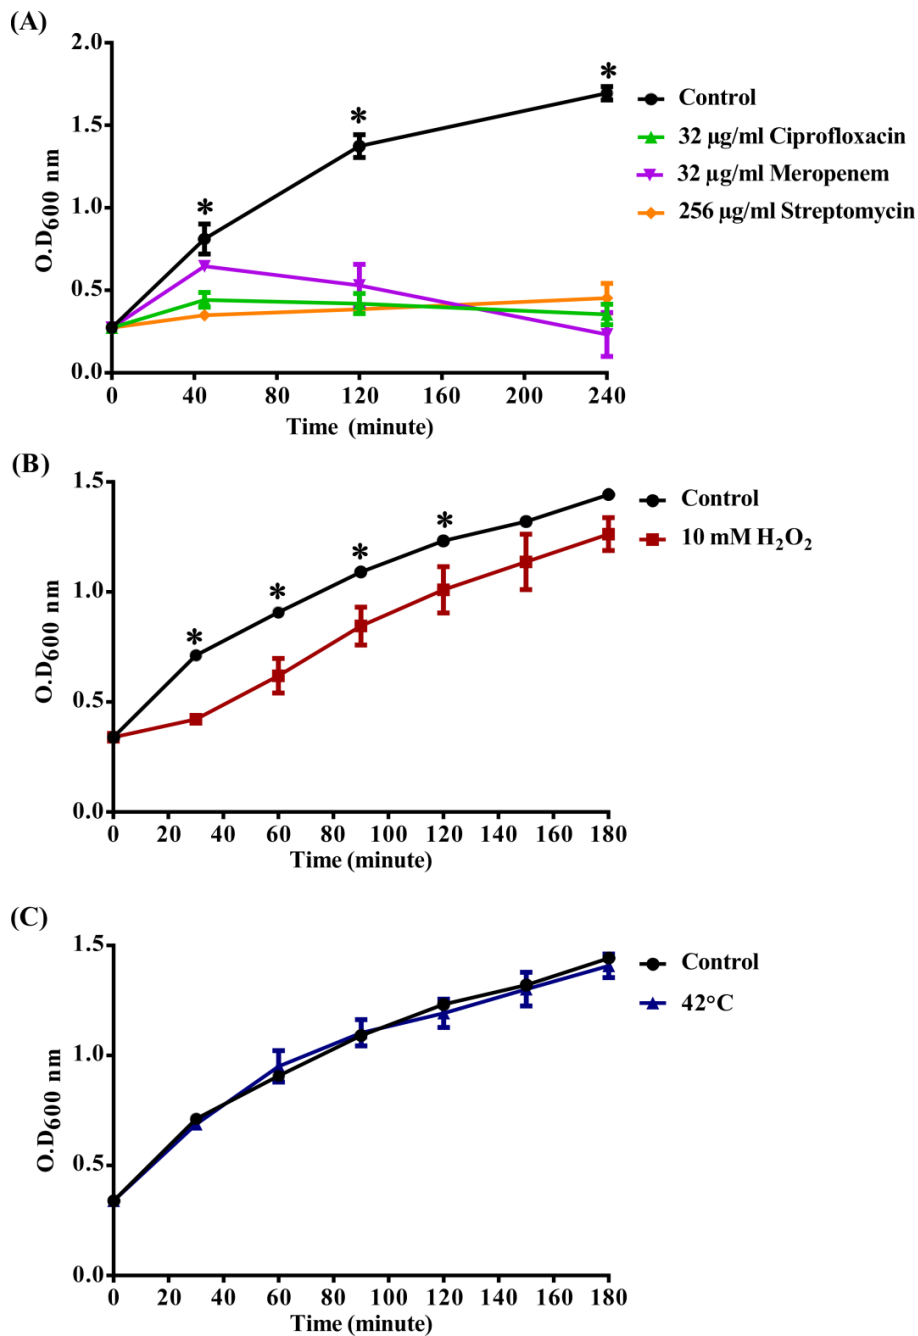

270

271 **Figure S14: Effect of exposing *A. baumannii* to different stress factors.**

272 Growth curves of *A. baumannii* ATCC 17879 upon exposure to (A) different antibiotics, (B) oxidative  
 273 stress and (C) high temperature (42 °C vs. 37 °C). Samples were withdrawn at different time intervals.

274 (A) Significant decrease in the growth rate was observed in the presence of all studied antibiotics that  
 275 cannot be reversed for 4 hours with except to meropenem that affects the growth significantly after 2  
 276 hours. (B) While the growth rate was significantly decreased under the effect of 10 mM H<sub>2</sub>O<sub>2</sub> vs.

277 unexposed cells (control) that was specifically clear until 30 min of exposure to H<sub>2</sub>O<sub>2</sub>, then the growth  
 278 restarts to increase slowly but remained lower than the unexposed cells. The data represent the means

279 of three independent experiments. The error bars represent the standard error of the means. Asterisks

280 (\*) indicate statistically significant differences (at  $p < 0.05$ ), as determined by ANOVA followed by

281 *post hoc* multiple *t* test.

282 **Figure S15:**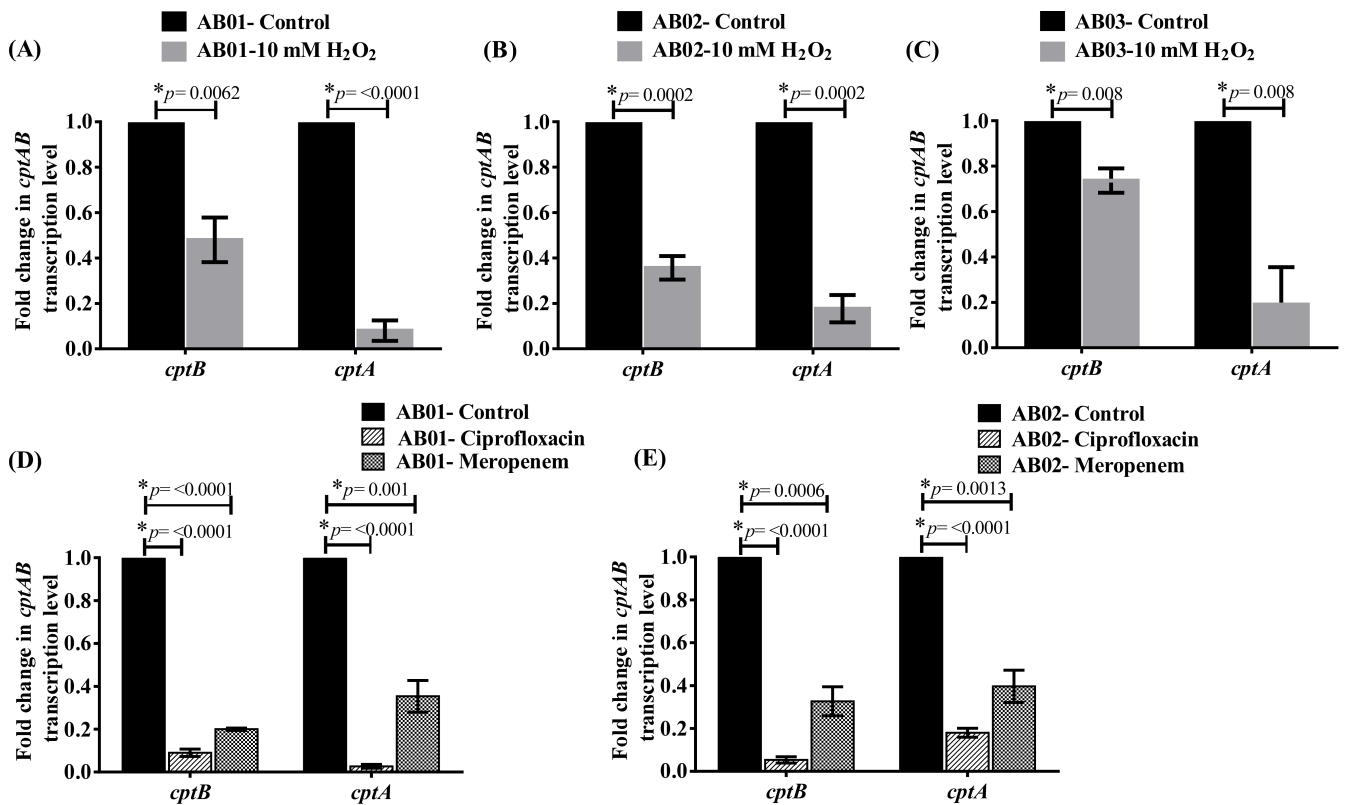

283

284 **Figure S15: Expression of CptBA system under different stressful conditions in *A. baumannii***  
285 **clinical isolates AB01, AB02 and AB03.**

286 Fold change in the transcription levels of *cptA* and *cptB* genes upon exposure of three isolates to (A-  
287 C) oxidative stress in addition to exposure of AB01 and AB02 to (D and E) different antibiotics.  
288 Significant downregulation was observed in *cptBA* under the effect of 10 mM H<sub>2</sub>O<sub>2</sub> in the three  
289 isolates, and in the presence of ciprofloxacin (32 μg/ml) and meropenem (32 μg/ml) for AB01 and  
290 AB02. Fold change was calculated using the  $\Delta\Delta C_t$  method. The data represent the means of three  
291 independent experiments. The error bars represent the standard error of the means. Asterisks (\*)  
292 indicate statistically significant differences (at  $p < 0.05$ ), as determined by the unpaired student *t* test.

293

294

295

296

\*The graphical abstract was created with BioRender.com and SnapGene® viewer software.
